# Supplementary material for: Evidence of Au(II) and Au(0) States in Bovine Serum Albumin-Au Nanoclusters Revealed by CW-EPR/LEPR and Peculiarities in HR-TEM/STEM Imaging
Source: MDPI journal article supplement (doi:10.3390/nano12091425), 2022-04-22
Supplement: s1 [file s1]

# Evidence of Au(II) and Au(0) States in Bovine Serum Albumin-Au Nanoclusters Revealed by CW-EPR/LEPR and Peculiarities in HR-TEM/STEM Imaging

Radek Ostruszka <sup>1</sup>, Giorgio Zoppellaro <sup>2,\*</sup>, Ondřej Tomanec <sup>2</sup>, Dominik Pinkas <sup>3</sup>, Vlada Filimonenko <sup>3</sup> and Karolína Šišková <sup>1,\*</sup>

<sup>1</sup> Department of Experimental Physics, Faculty of Science, Palacký University, tř. 17.listopadu 12, 77900 Olomouc, Czech Republic; radek.ostruszka@upol.cz

<sup>2</sup> Regional Centre of Advanced Technologies and Materials, Faculty of Science, Palacký University, tř. 17.listopadu 12, 77900 Olomouc, Czech Republic; ondrej.tomanec@upol.cz

<sup>3</sup> Institute of Molecular Genetics of the Czech Academy of Sciences, Microscopy Centre, Electron Microscopy Core Facility, Vídeňská 1083, 142 20 Prague 4, Czech Republic; dominik.pinkas@img.cas.cz (D.P.); vlada.filimonenko@img.cas.cz (V.F.)

\* Correspondence: giorgio.zoppellaro@upol.cz (G.Z.); karolina.siskova@upol.cz (K.Š.)

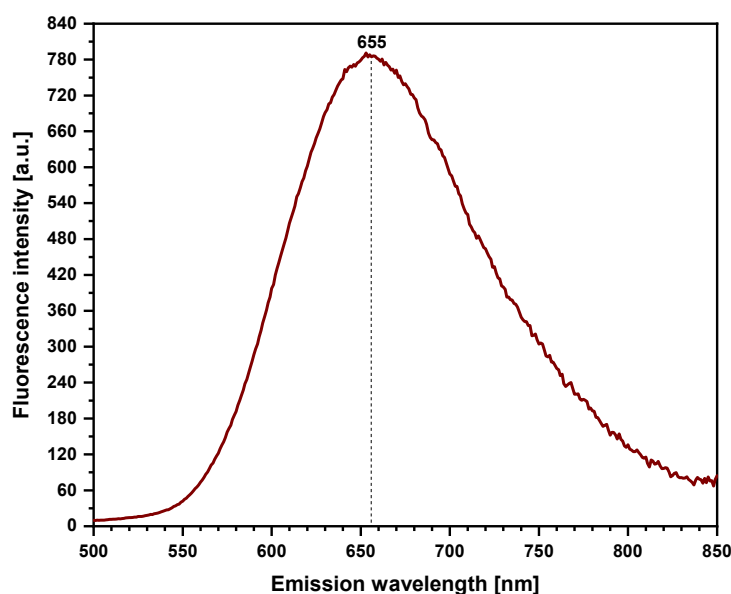

**Figure S1.** Corrected emission spectrum of AuBSA in deionized water.

**Table S1.** Quantum yield and wavelength of fluorescence maximum of AuBSA.

| Sample             | Absorbance | Quantum Yield [%] | Wavelength of Fluorescence Maximum [nm] |
|--------------------|------------|-------------------|-----------------------------------------|
| AuBSA I            | 0.0425     | 6.72              | 655                                     |
| AuBSA II           | 0.0453     | 6.57              | 654                                     |
| AuBSA III          | 0.0435     | 6.68              | 655                                     |
| Average            | 0.0438     | 6.7               | 655                                     |
| Standard Deviation | 0.0014     | 0.1               | 1                                       |

Note: Quantum yields were calculated from corrected emission spectra and with respect to DCM dissolved in ethanol. DCM in ethanol was chosen as a standard due to the fact that it reveals a very similar excitation wavelength and fluorescence emission profile as AuBSA.

**EPR Data treatments.** Simulation of the powder EPR spectrum was performed with the WinEPR SimFonia software (V.1.25, EPR Division, Bruker Instruments, Inc., Billerica, USA) using second-order perturbation theory and spherical integration (grid) of 200 (theta), 200 (phi).

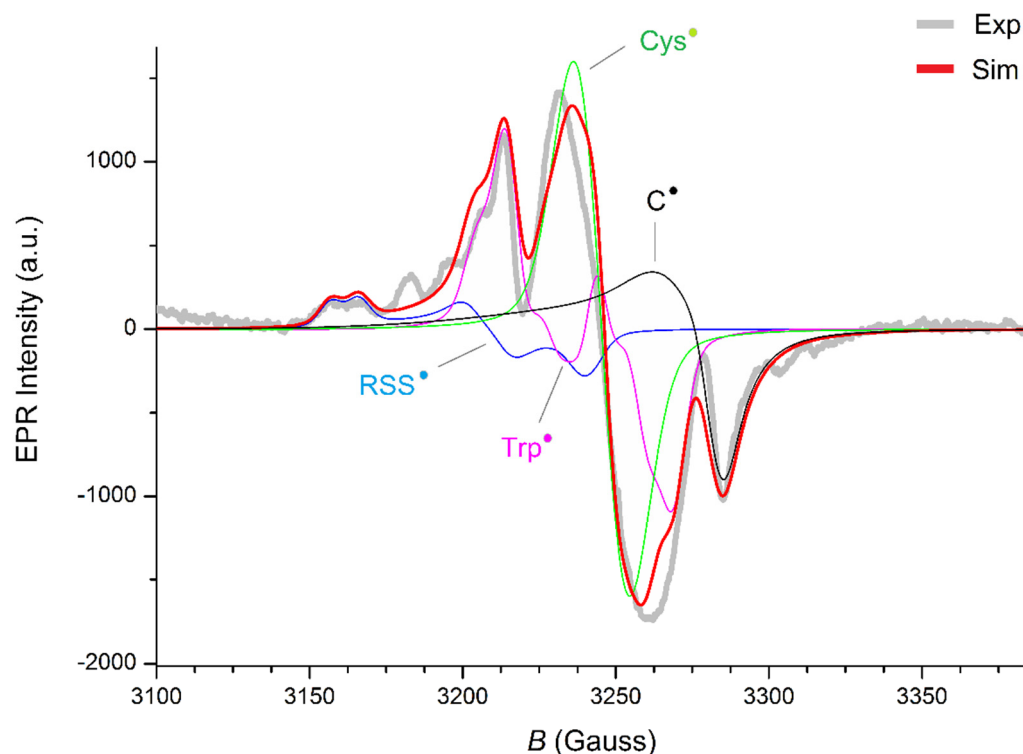

**Figure S2.** CW-EPR spectrum obtained after 20 min of UV irradiation of BSA in water. Experimental parameters:  $T = 90$  K, 9.0802 GHz frequency, 100kHz modulation frequency, 0.03 s time constant, 1.60 mW applied power, 0.5 mT modulation width,  $6 \times 100$  Gain, 1 min sweep time, and 5 scans accumulated and averaged. The simulation of the various spin components is shown together with their sum (red-line).

**Doublet specie,  $S = 1/2$ , tryptophan radical ( $\text{Trp}\bullet$ ).**  $g_x = 2.002$ ,  $g_y = 2.003$ ,  $g_z = 2.003$ .  $A_N(x, y, z) = 2.0$ , G, 2.0 G, 10.0 G;  $A_{H\beta 1}(x, y, z) = 28.3$ , G, 28.3 G, 28.3 G;  $A_{H\beta 2}(x, y, z) = 13.0$ , G, 13.0 G, 13.0 G Line-width tensor  $(x, y, z) = 9.0$  G, 9.0 G, 9.0 G. Lorentzian/Gaussian ratio = 0.8. Relative intensity weight = 30.1%

**Doublet specie,  $S = 1/2$ , perthiyl radical ( $\text{RSS}\bullet$ ).**  $g_x = 2.052$ ,  $g_y = 2.018$ ,  $g_z = 2.002$ . Line-width tensor  $(x, y, z) = 7.0$  G, 9.0 G, 9.0 G. Lorentzian/Gaussian ratio = 0.8. Relative intensity weight = 7.1%

**Doublet specie,  $S = 1/2$ , thiyl radical ( $\text{Cys}\bullet$ ).**  $g_x = 2.17$ ,  $g_y = 2.003$ ,  $g_z = 2.002$ . Line-width tensor  $(x, y, z) = 16.0$  G, 16.0 G, 16.0 G. Lorentzian/Gaussian ratio = 0.8. Relative intensity weight = 40.2%

**Doublet specie,  $S = 1/2$ , C-based radical ( $\text{C}\bullet$ ).**  $g_x = 2.012$ ,  $g_y = 1.984$ ,  $g_z = 1.977$ ,  $g_{\text{avg}} = 1.991$ . Line-width tensor  $(x, y, z) = 60.0$  G, 16.0 G, 6.0 G. Lorentzian/Gaussian ratio = 0.8. Relative intensity weight = 22.6%

**Preparation of Au-Tyr and Au-Cys:** 1 mL solutions of Tyr and/or Cys (12.6 mM and/or 21.1 mM, respectively) were mixed with  $\text{HAuCl}_4$  (10 mM, 1 mL) under vigorous stirring (600 rpm) after 90 s followed by NaOH addition (1 M, 200  $\mu\text{L}$ ), and after another 90 s, microwave heating was applied (10 s, power set to 150 W) as in the case of AuBSA preparation.

UV-vis absorption spectra of Au-Tyr and Au-Cys were then recorded, and the kinetics of potential surface plasmon resonance peak at around 525 nm was followed in the period ranging between 0 and 61.75 mins elapsed from the microwave heating application.

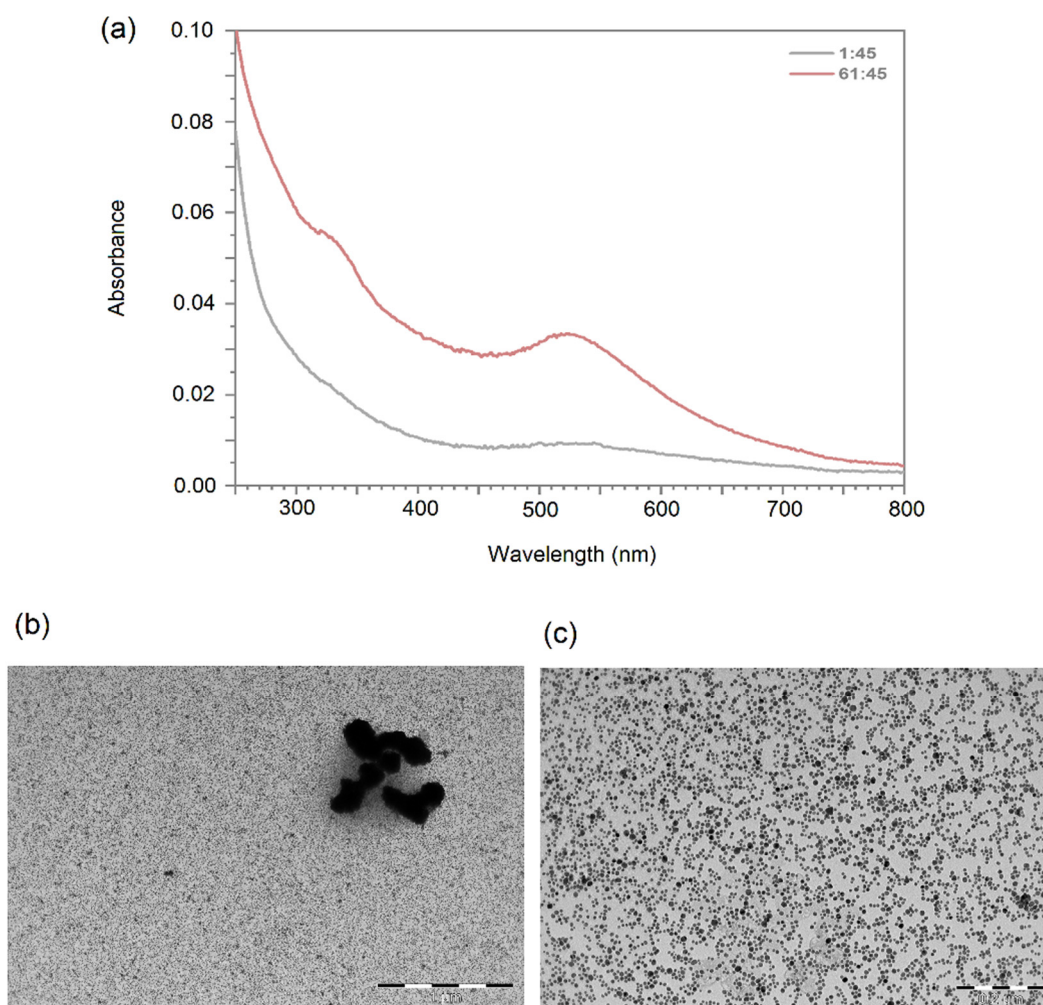

**Figure S3.** (a) Extinction spectra of Au-Tyr in deionized water recorded at 1 minute and 45 seconds after synthesis (grey line) and 61 minutes and 45 seconds after synthesis (red line). Panels (b) and (c) show the TEM images of Au-Tyr recorded at different magnifications. Scale bar in panel (b) equals to 1  $\mu\text{m}$ , and in panel (c) equals to 0.2  $\mu\text{m}$ .

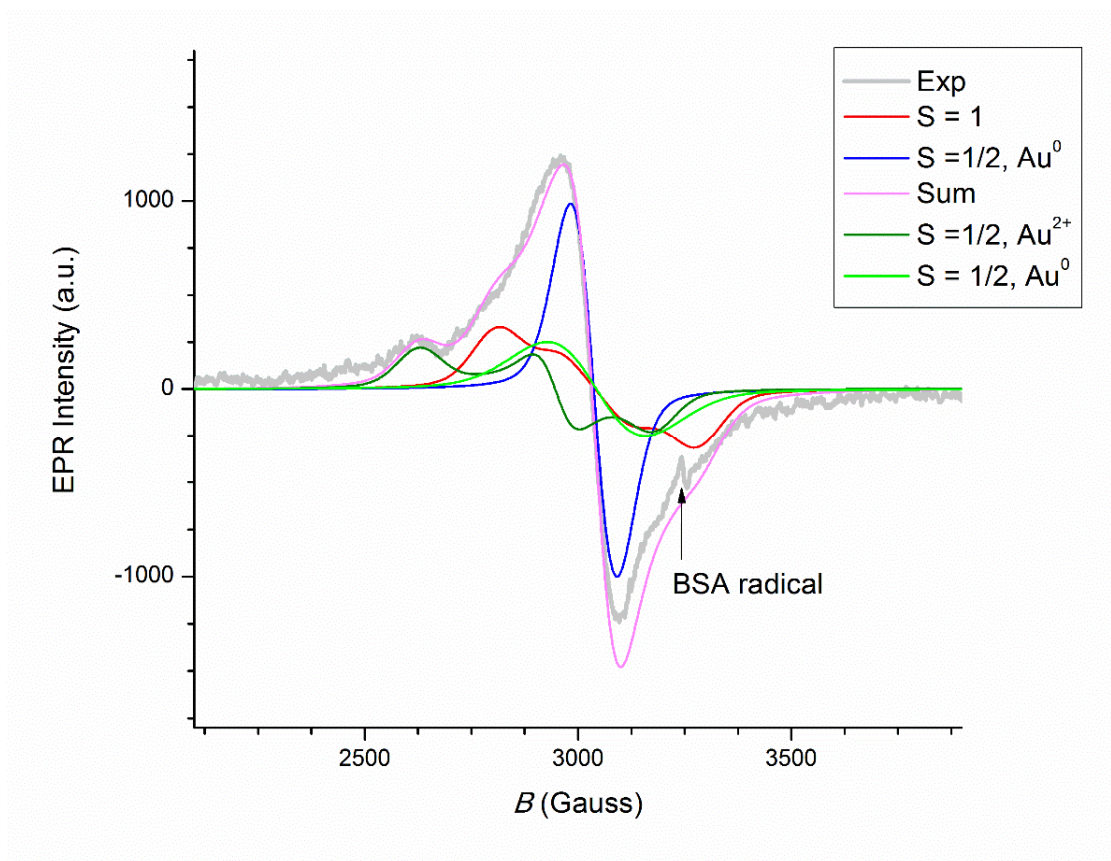

**Figure S4.** CW-EPR spectrum of AuBSA in water recorded at  $T = 90$  K in dark conditions with the EPR simulation of the diverse spin-components associated to the Au nanoclusters.

**Doublet specie**,  $S = 1/2$ , dark green line,  $\text{Au}^{2+}$ .  $g_x = 2.47$ ,  $g_y = 2.20$ ,  $g_z = 2.04$ . Line-width tensor  $(x, y, z) = 100$  G, 80 G, 100 G. Lorentzian/Gaussian ratio = 0.63. Relative intensity weight = 12.8%

**Doublet specie**,  $S = 1/2$ , blue line,  $\text{Au}^0$ .  $g_x = 2.13$ ,  $g_y = 2.13$ ,  $g_z = 2.13$ . Line-width tensor  $(x, y, z) = 180$  G, 100 G, 100 G. Lorentzian/Gaussian ratio = 0.63. Relative intensity weight = 55.2% and  $S = 1/2$ , green line,  $\text{Au}^0$ .  $g_x = 2.13$ ,  $g_y = 2.13$ ,  $g_z = 2.13$ . Line-width tensor  $(x, y, z) = 230$  G, 230 G, 230 G. Lorentzian/Gaussian ratio = 0.63. Relative intensity weight = 13.8%

**Triplet specie**,  $S = 1$ , red line.  $g_x = 2.13$ ,  $g_y = 2.13$ ,  $g_z = 2.13$ . Line-width tensor  $(x, y, z) = 100$  G, 100 G, 100 G.  $D = 205$  G,  $E = 60$  G. Lorentzian/Gaussian ratio = 0.63. Relative intensity weight = 18.2%



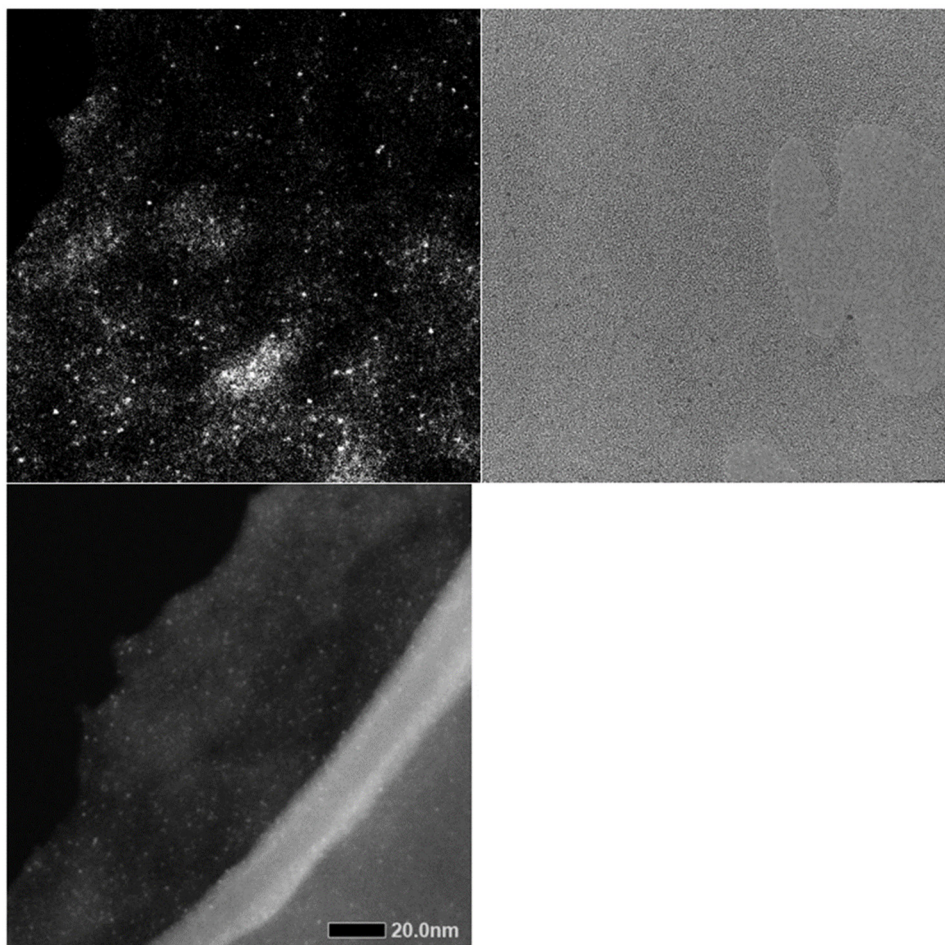

**Figure S5.** Further STEM images of AuBSA.

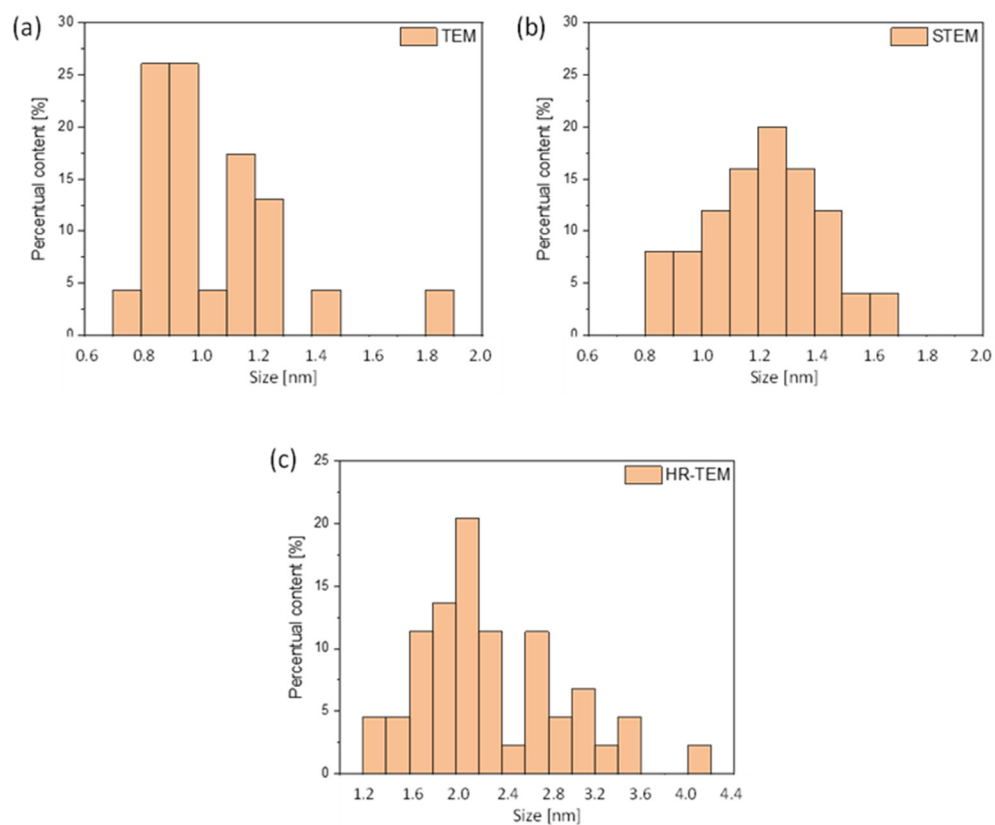

**Figure S6.** Particle size distributions derived from (a) TEM, (b) STEM, and/or (c) HR-TEM images.

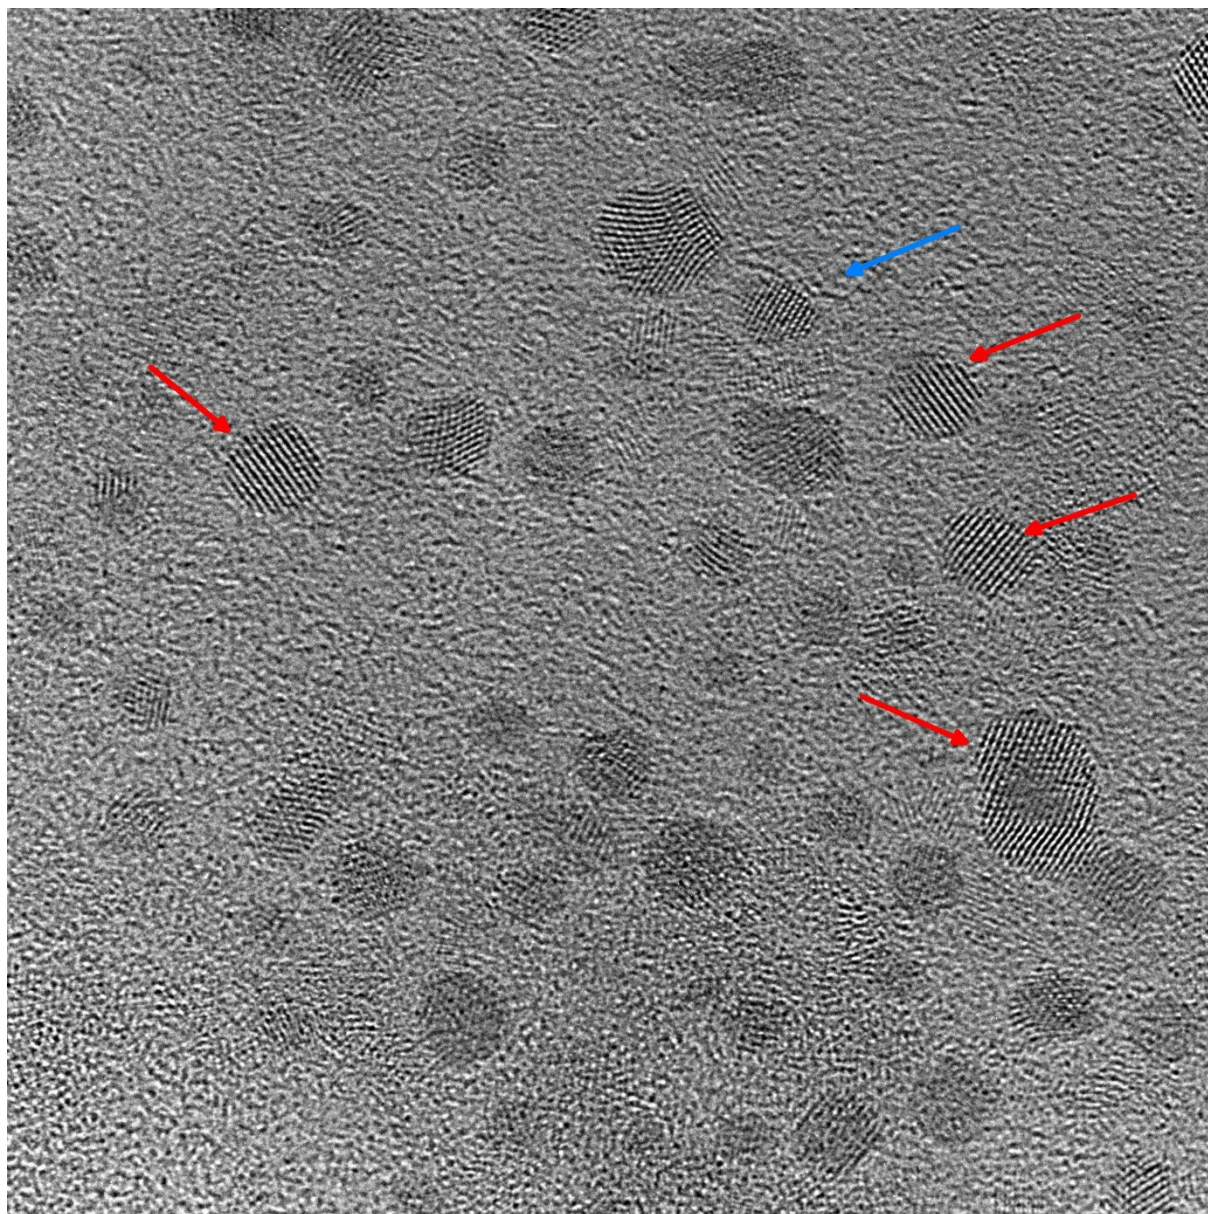

**Figure S7.** Lattice planes determined for several AuNCs of AuBSA in a particular HR-TEM image. Red arrows indicate Au(111), while the blue arrow represents Au(200).

Filename: nanomaterials-1678792-supplementary.docx  
Directory: E:\4.22\applsci-1664757  
Template: C:\Users\MDPI\AppData\Roaming\Microsoft\Templates\Normal.dotm

Title:

Subject:

Author: MDPI

Keywords:

Comments:

Creation Date: 4/21/2022 9:13:00 PM

Change Number: 3

Last Saved On: 4/21/2022 9:13:00 PM

Last Saved By: Ivana Kalajdžić

Total Editing Time: 1 Minute

Last Printed On: 4/22/2022 4:52:00 PM

As of Last Complete Printing

Number of Pages: 7

Number of Words: 910 (approx.)

Number of Characters: 4,627 (approx.)
